# Supplementary material
Source: PubMed Central journal article supplement (PMC5471618)
Supplement: NIHMS863022-supplement-3.pdf [file NIHMS863022-supplement-3.pdf]

**Supplemental Information**

**$\beta$  Cell Aging Markers Have Heterogeneous  
Distribution and Are Induced by Insulin Resistance**

**Cristina Aguayo-Mazzucato, Mark van Haaren, Magdalena Mruk, Terence B. Lee, Jr., Caitlin Crawford, Jennifer Hollister-Lock, Brooke A. Sullivan, James W. Johnson, Aref Ebrahimi, Jonathan M. Dreyfuss, Jan Van Deursen, Gordon C. Weir, and Susan Bonner-Weir**

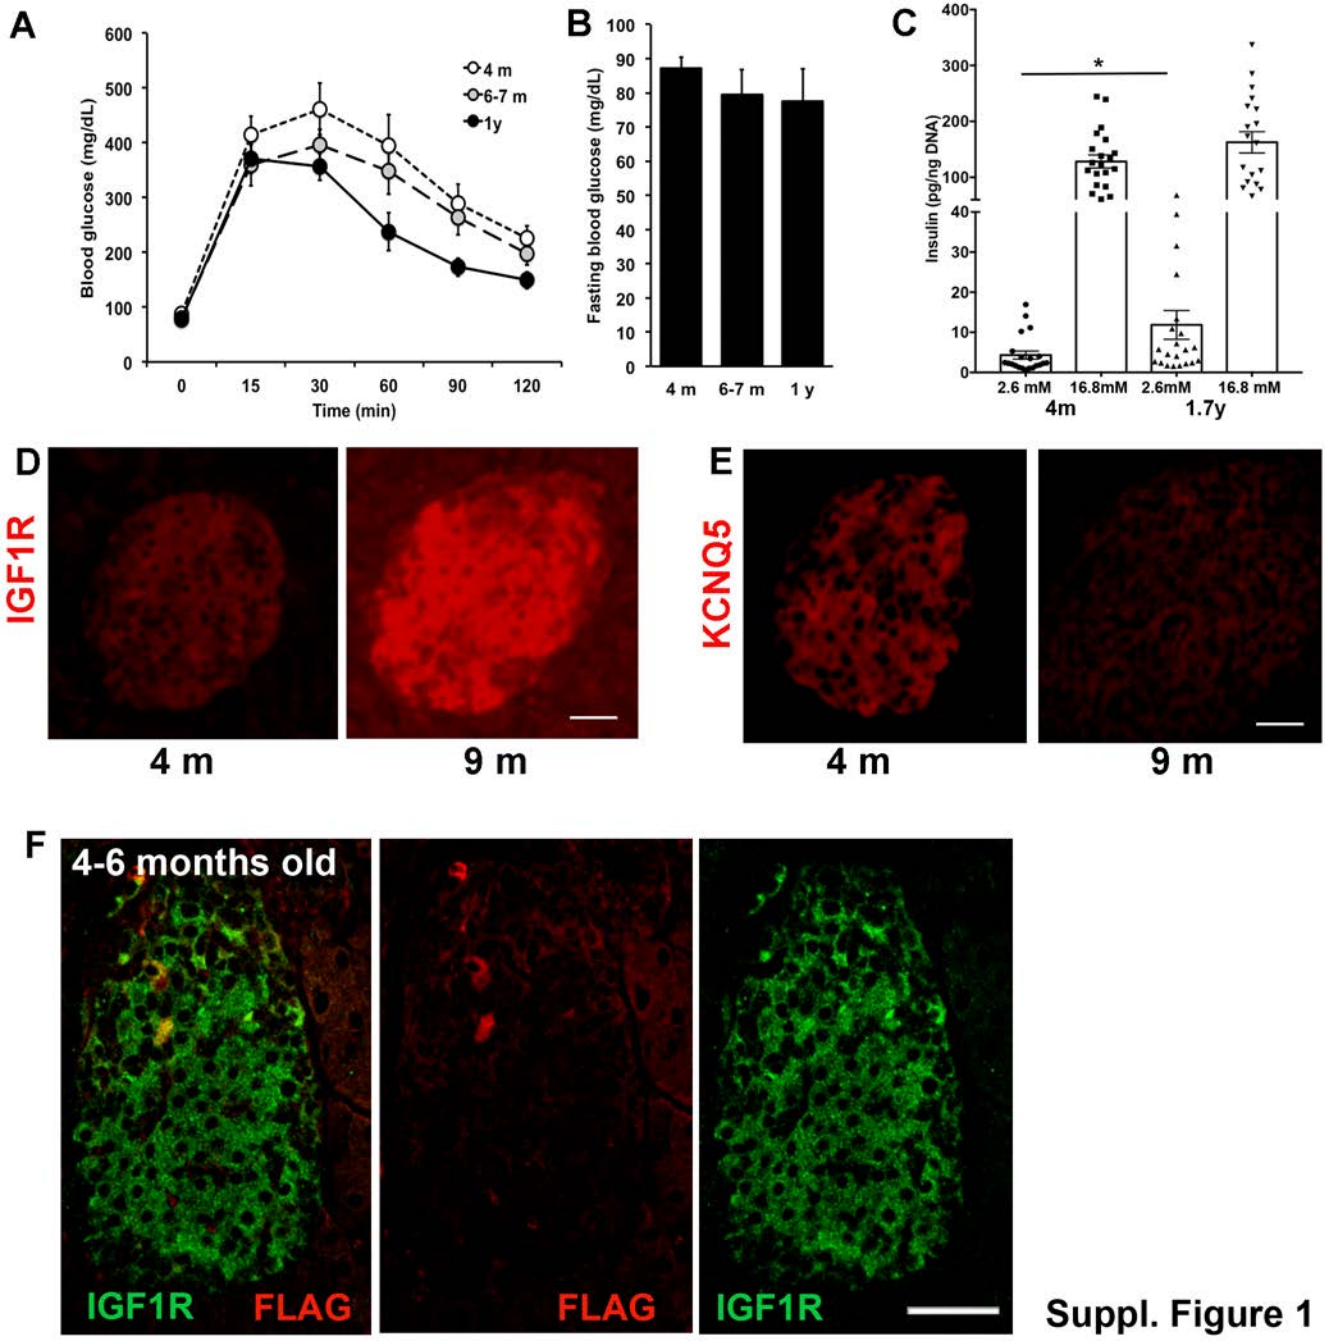

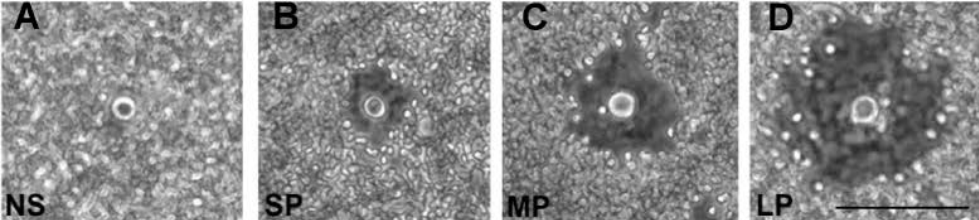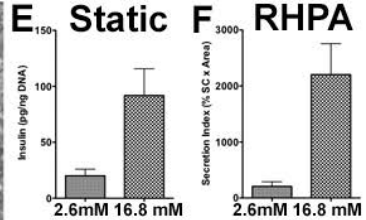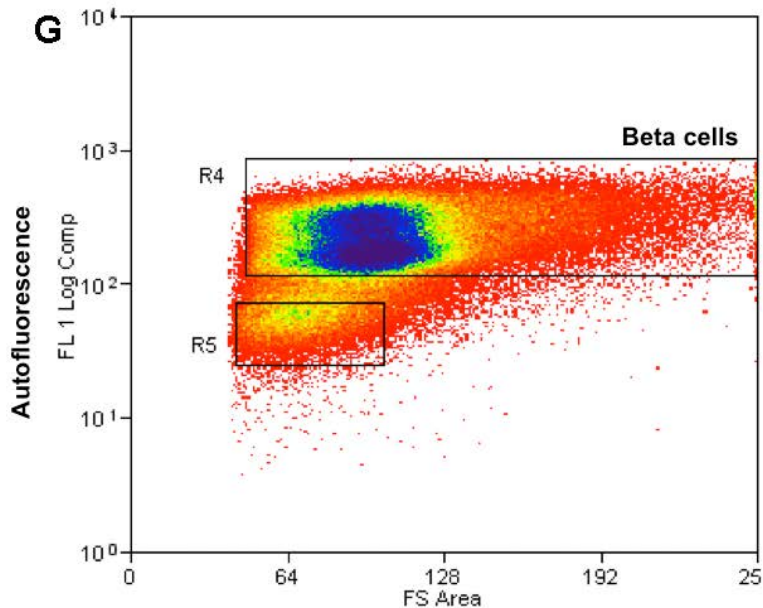

**Suppl. Figure 2**

**A****Genes in Hallmark Beta Cell Gene Set**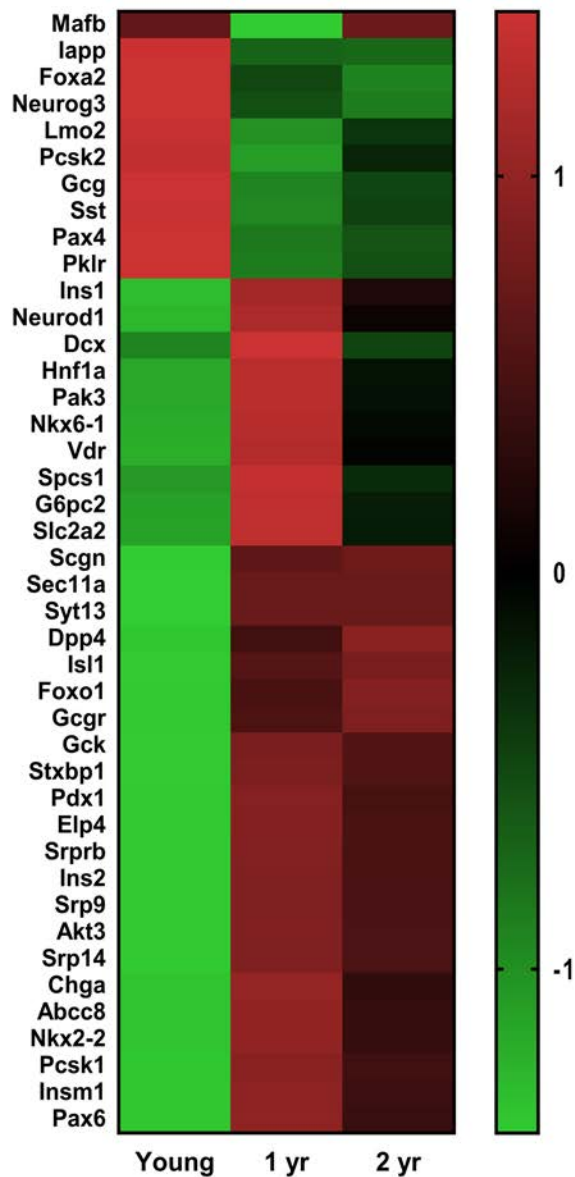**B****Genes in GO Cellular Senescence Gene Set**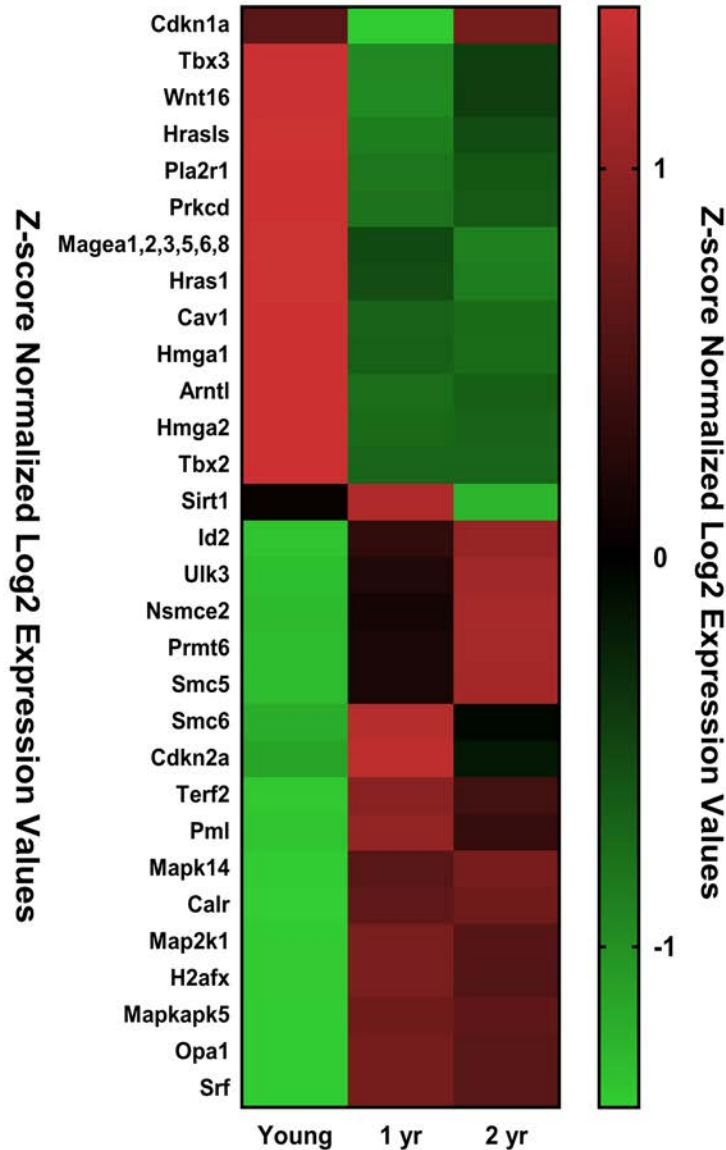

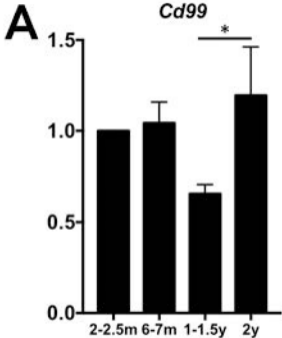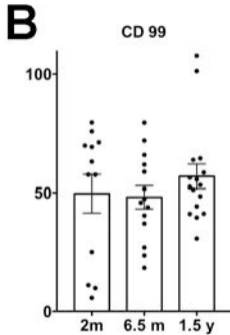

Suppl Fig 4

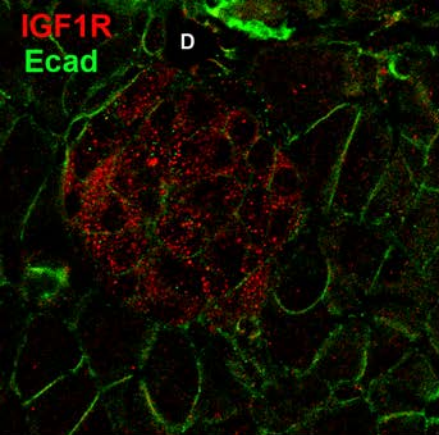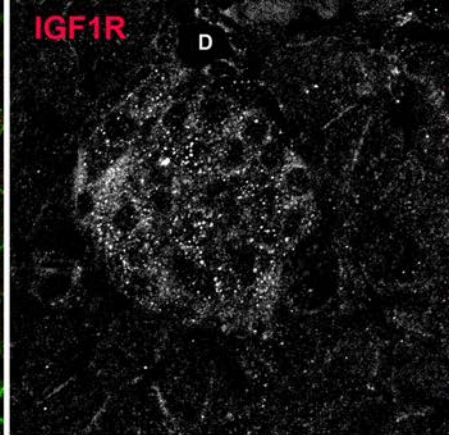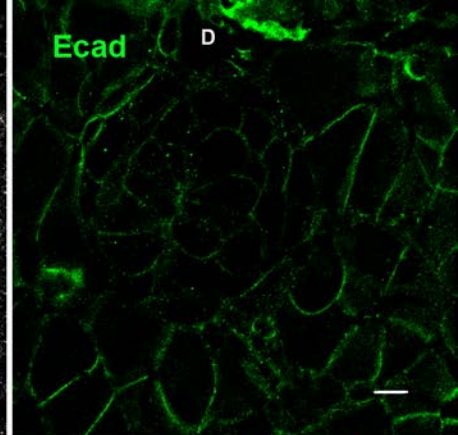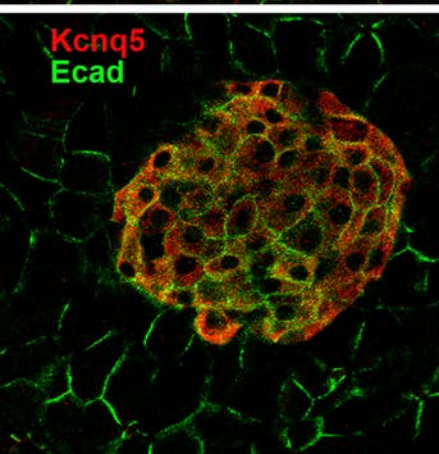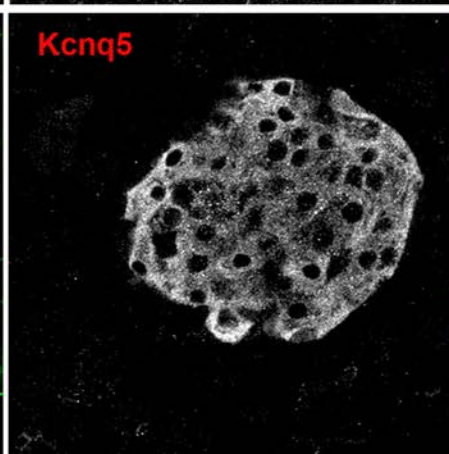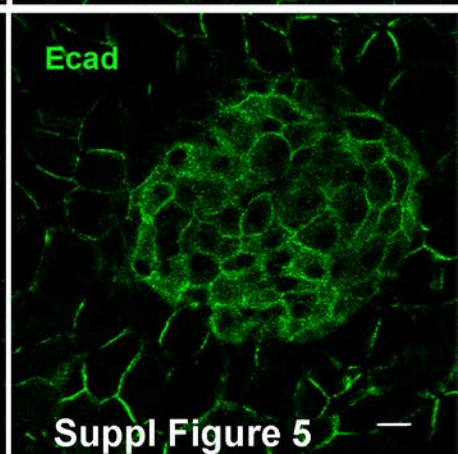



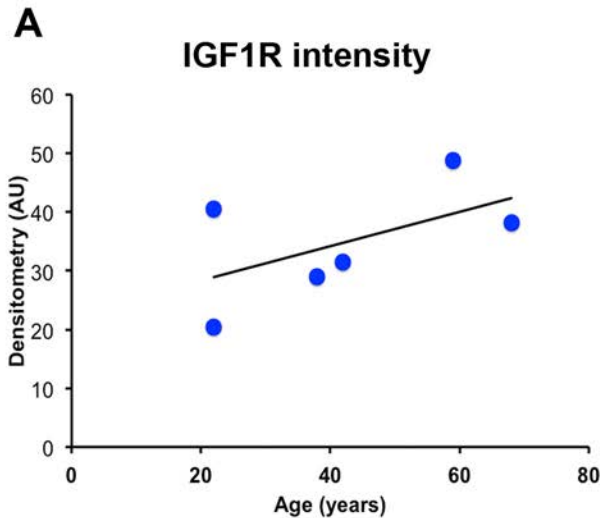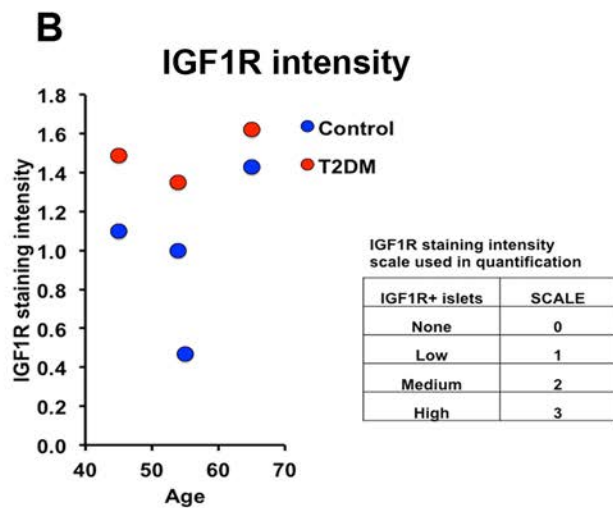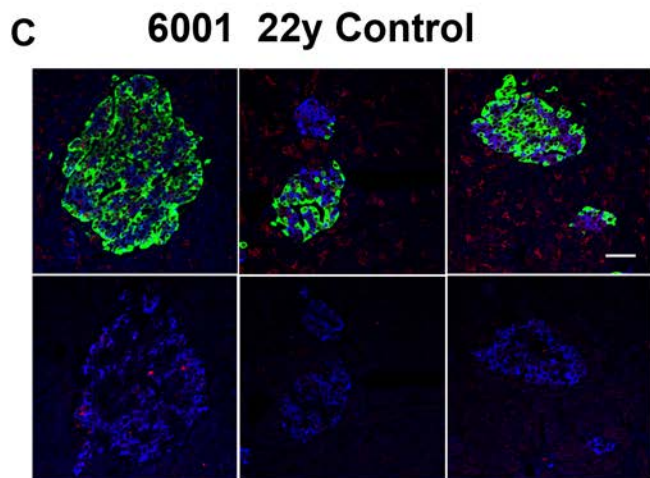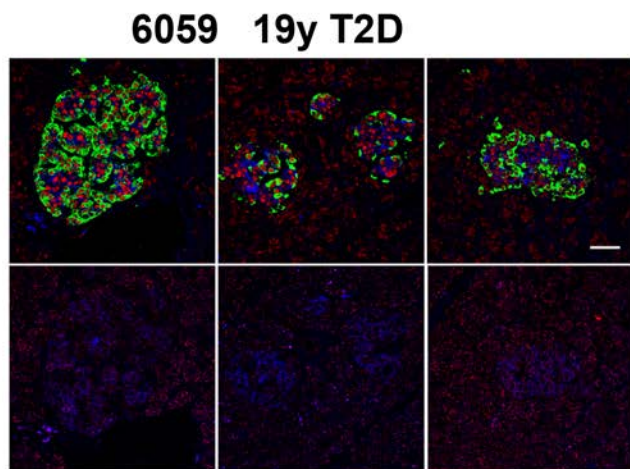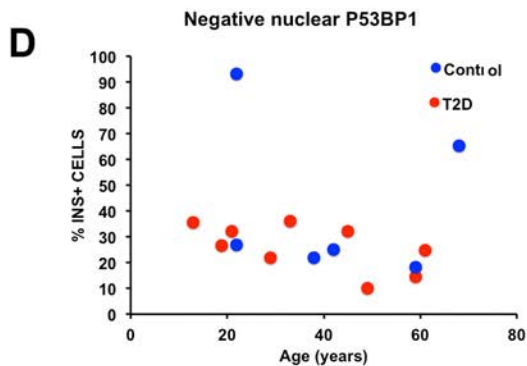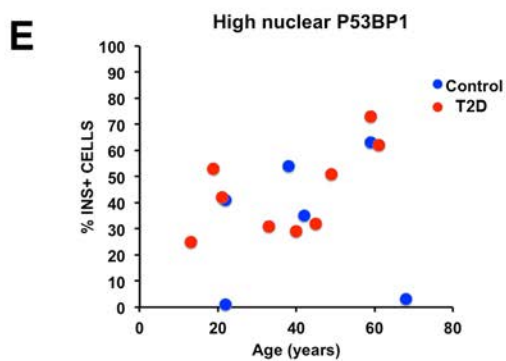

A 6 month

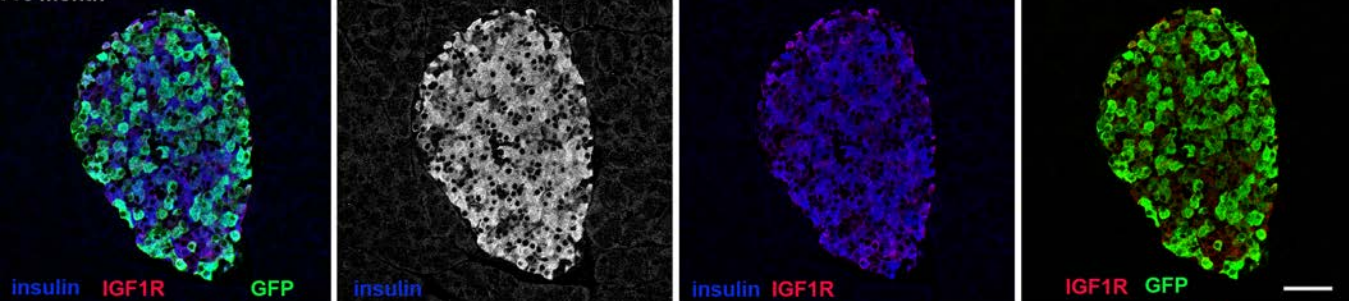

B 2 year

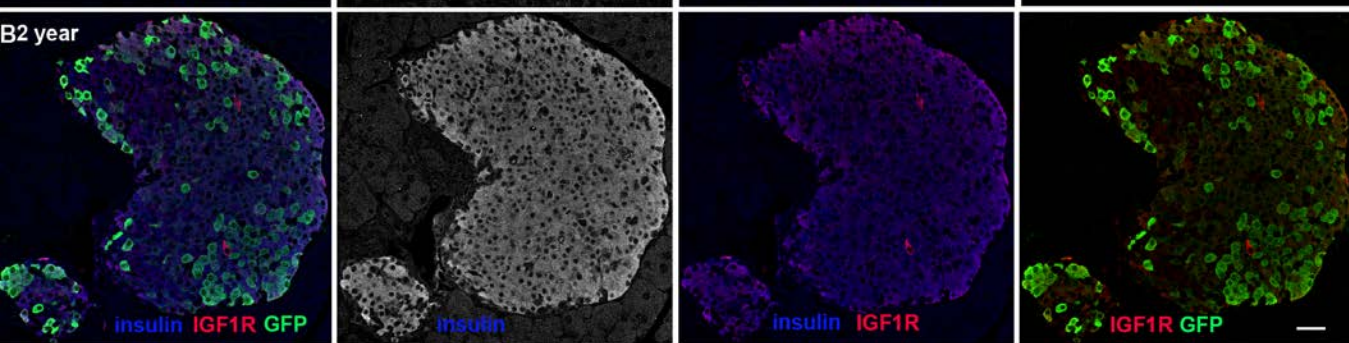

C

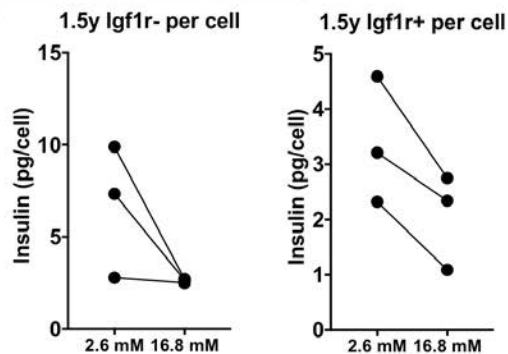

Suppl. Figure 7



## SUPPLEMENTAL INFORMATION

**Supplementary Figure 1. Changes of  $\beta$ -cell aging markers occur even in aged mice that remain normoglycemic. Related to Figures 1 and 3.** INK-ATTAC mice at 1y show neither a decline in glucose tolerance after IPGGT (**A**) nor fasting hyperglycemia (**B**). Yet with age there is an increase in basal insulin secretion (**C**). Data presented for each of the triplicate samples (10 islets) of 7 individual mice/age. Additionally with age IGF1R protein levels increased (**D**) and KCNQ5 protein decreased (**E**). n=4 animals/age. **F**. Co-localization of IGF1R and p16 reporter FLAG in a subset of cells from 4-6 m INK-ATTAC mice. Data are Means  $\pm$  SEM. Magnification bar=25  $\mu$ m (**D**, **E**); 50  $\mu$ m (**F**).

**Supplementary Figure 2. Individual  $\beta$ -cell insulin secretion and  $\beta$ -cell FACS sorting criteria. Related to Figure 1 and STAR methods.** In reverse hemolytic plaque assay (RHPA), the immunoplaque area is directly proportional to the amount of insulin secreted by individual  $\beta$  cells. Representative pictures of non-secreting (**A**), small plaques (**B**), medium plaques (**C**) or large plaques (**D**); this image has been previously published in (Aguayo-Mazzucato et al., 2011). Magnification bar= 100  $\mu$ m Insulin secretion is comparable using static incubation (insulin pg/ngDNA) (**E**) or the reverse hemolytic plaque assay (secretion index=% secreting cells X plaque area) (**F**). **G**. FACS sorting criteria for a purified fraction of  $\beta$  cells based on autofluorescence (King et al., 2007). Data are Means  $\pm$  SEM.

**Supplementary Figure 3. Age-induced changes in  $\beta$ -cell and senescence gene sets. Related to Figure 2C.** Heatmaps of gene expression from microarray data of purified  $\beta$ -cells from young, 1y and 2y old mice showing changes in expression of Hallmark  $\beta$  cell (**A**) and GO Cellular senescence (**B**) gene sets. Comparison of young to 1 y shows increased maturation of  $\beta$ -cell identity whereas comparison of 1y and 2 y show increase in cellular senescent genes. These data show that some characteristic  $\beta$ -cell genes are turned off with aging however, the overall gene expression profile is very different between

young and 2 year old supporting the presence of different phenotypes at different life stages of a  $\beta$ -cell.

**Supplementary Figure 4. CD99 mRNA and protein timecourse. Related to Figure 2F.** Timecourse expression of *CD99* mRNA (**A**) and quantification of protein expression by densitometry(**B**). Same samples as used in Figure 2F and 3A. At 2m there are two subpopulations, a high and low; the low disappears with age. Data are Means  $\pm$  SEM.

**Supplementary Figure 5. Plasma membrane expression of aging markers. Related to Figure 3.** IGF1R and KCNQ5 colocalize with cell membrane marker E-Cadherin. Plasma membrane staining of IGF1R is more clearly seen in ducts (D) and acinar cells, which have lower levels of cytoplasmic expression than  $\beta$  cells. Merged and then single channels shown. Magnification bar=10  $\mu$ m

**Supplementary Figure 6. Expression of  $\beta$ -cell aging markers in human  $\beta$ -cells and changes induced by T2D. Related to Figures 3F and 6.**  $\beta$ -cells of human donors express higher levels of IGF1R protein with age (**A**) and with T2D (**B**) protein as seen by immunostaining. Magnification bar=50  $\mu$ m **C**. The presence of T2D in young donors appears to induce P53BP1 and IGF1R expression. Quantification of  $\beta$ -cells that were negative (**D**) or highly positive (**E**) for nuclear P53BP1 in pancreas from donors with and without T2D over a range of ages. Details of the human donors are given in **Key Resources**. Data are values for individual donors.

**Supplementary Figure 7. Expression of IGF1R in  $\beta$ -cells from MIP-GFP mice and insulin secretion from IGF1R positive and negative  $\beta$ -cells obtained from old mice. Related to Figures 3I and 4C.** Representative pictures of insulin, IGF1R and GFP co-expression from 6 m (**A**) and 2 y (**B**) MIP:GFP mice showing the decline of GFP expression with age. Merged and separated channels. Magnification bar=50  $\mu$ m. GFP antibody had been optimized to show differential

expression whereas that of insulin was not. Even GFP<sup>low</sup> were stained for insulin.  
**C.** Both IGF1R+ and IGF1R-  $\beta$ -cells from 1.5 y C57Bl/6J mice lack glucose-stimulated insulin secretion. n=3 independent cell preparations. Data are Means  $\pm$  SEM

**Supplementary Table 1.** Top 550 cells surface genes differentially expressed between young and aged  $\beta$  cells as shown in the volcano plot (**Related to Fig. 2D**).

#### **REFERENCES FOR SUPPLEMENTAL INFORMATION**

Aguayo-Mazzucato, C., Koh, A., El Khattabi, I., Li, W.C., Toschi, E., Jermendy, A., Juhl, K., Mao, K., Weir, G.C., Sharma, A., et al. (2011). Mafa expression enhances glucose-responsive insulin secretion in neonatal rat beta cells. *Diabetologia* *54*, 583-593.

King, A.J., Fernandes, J.R., Hollister-Lock, J., Nienaber, C.E., Bonner-Weir, S., and Weir, G.C. (2007). Normal relationship of beta- and non-beta-cells not needed for successful islet transplantation. *Diabetes* *56*, 2312-2318.
